# Supplementary material for: Weak distance dependence of through-bond interactions in tetrahydro-4H-thiopyran-4-ylidene end-capped oligo(cyclohexylidenes); a computational survey
Source: Royal Society of Chemistry journal article supplement (doi:10.1039/b616893k), 2007-01-01
Supplement: b616893k.pdf [file b616893k.pdf]

Electronic Supplementary Material for PCCP

This journal is © The Owner Societies 2007

**Supporting information**

**for**

**Weak distance dependence of through-bond interactions in tetrahydro-4*H*-thiopyran-4-ylidene end-capped oligo(cyclohexylidenes); a computational survey**

Remco W. A. Havenith,<sup>a,b</sup> Cornelis A. van Walree,<sup>b</sup> Alwin W. Marsman,<sup>b</sup> Joop H. van Lenthe<sup>a</sup> and Leonardus W. Jenneskens,<sup>\*,b</sup>

**Table S1.** RHF/6-31G\* optimised Cartesian coordinates of **1(1)**.

| <b>Atom</b> | <b>X</b>  | <b>Y</b>  | <b>Z</b>  |
|-------------|-----------|-----------|-----------|
| C           | -0.372214 | -1.202923 | 0.000000  |
| C           | 0.372214  | 1.202923  | 0.000000  |
| C           | 0.835888  | 2.780442  | 2.355140  |
| C           | -0.835888 | -2.780442 | -2.355140 |
| C           | 0.835888  | 2.780442  | -2.355140 |
| C           | -0.835888 | -2.780442 | 2.355140  |
| C           | -0.835888 | 5.154614  | 2.383387  |
| C           | 0.835888  | -5.154614 | -2.383387 |
| C           | -0.835888 | 5.154614  | -2.383387 |
| C           | 0.835888  | -5.154614 | 2.383387  |
| C           | -0.462987 | 6.745599  | 0.000000  |
| C           | 0.462987  | -6.745599 | 0.000000  |
| H           | 2.809399  | 3.372935  | 2.360476  |
| H           | -2.809399 | -3.372935 | -2.360476 |
| H           | 2.809399  | 3.372935  | -2.360476 |
| H           | -2.809399 | -3.372935 | 2.360476  |
| H           | 0.547592  | 1.729294  | 4.079472  |
| H           | -0.547592 | -1.729294 | -4.079472 |
| H           | 0.547592  | 1.729294  | -4.079472 |
| H           | -0.547592 | -1.729294 | 4.079472  |
| H           | -2.805710 | 4.582416  | 2.525849  |
| H           | 2.805710  | -4.582416 | -2.525849 |
| H           | -2.805710 | 4.582416  | -2.525849 |
| H           | 2.805710  | -4.582416 | 2.525849  |
| H           | -0.419281 | 6.274251  | 4.054388  |
| H           | 0.419281  | -6.274251 | -4.054388 |
| H           | -0.419281 | 6.274251  | -4.054388 |
| H           | 0.419281  | -6.274251 | 4.054388  |
| H           | 1.440337  | 7.528547  | 0.000000  |
| H           | -1.440337 | -7.528547 | 0.000000  |
| H           | -1.754992 | 8.342075  | 0.000000  |
| H           | 1.754992  | -8.342075 | 0.000000  |

**Table S2.** RHF/6-31G\* optimised Cartesian coordinates of **1(2)**.

| Atom | X         | Y          | Z         |
|------|-----------|------------|-----------|
| C    | 0.792019  | 1.222426   | 2.347736  |
| C    | -0.792019 | -1.222426  | -2.347736 |
| C    | 0.792019  | 1.222426   | -2.347736 |
| C    | -0.792019 | -1.222426  | 2.347736  |
| C    | -0.318641 | -2.797900  | 0.000000  |
| C    | 0.318641  | 2.797900   | 0.000000  |
| C    | 0.428868  | -5.202684  | 0.000000  |
| C    | -0.428868 | 5.202684   | 0.000000  |
| C    | 0.887368  | -6.781308  | 2.354891  |
| C    | -0.887368 | 6.781308   | -2.354891 |
| C    | 0.887368  | -6.781308  | -2.354891 |
| C    | -0.887368 | 6.781308   | 2.354891  |
| C    | -0.792019 | -9.150659  | 2.383229  |
| C    | 0.792019  | 9.150659   | -2.383229 |
| C    | -0.792019 | -9.150659  | -2.383229 |
| C    | 0.792019  | 9.150659   | 2.383229  |
| C    | -0.424403 | -10.743109 | 0.000000  |
| C    | 0.424403  | 10.743109  | 0.000000  |
| H    | 2.782493  | 0.698150   | 2.396397  |
| H    | -2.782493 | -0.698150  | -2.396397 |
| H    | 2.782493  | 0.698150   | -2.396397 |
| H    | -2.782493 | -0.698150  | 2.396397  |
| H    | 2.858879  | -7.380426  | 2.360508  |
| H    | -2.858879 | 7.380426   | -2.360508 |
| H    | 2.858879  | -7.380426  | -2.360508 |
| H    | -2.858879 | 7.380426   | 2.360508  |
| H    | -2.759984 | -8.572421  | 2.526070  |
| H    | 2.759984  | 8.572421   | -2.526070 |
| H    | -2.759984 | -8.572421  | -2.526070 |
| H    | 2.759984  | 8.572421   | 2.526070  |
| H    | 1.476372  | -11.532134 | 0.000000  |
| H    | -1.476372 | 11.532134  | 0.000000  |
| H    | 0.415974  | 2.245663   | 4.072203  |
| H    | -0.415974 | -2.245663  | -4.072203 |
| H    | 0.415974  | 2.245663   | -4.072203 |
| H    | -0.415974 | -2.245663  | 4.072203  |
| H    | 0.600630  | -5.729711  | 4.079250  |
| H    | -0.600630 | 5.729711   | -4.079250 |
| H    | 0.600630  | -5.729711  | -4.079250 |
| H    | -0.600630 | 5.729711   | 4.079250  |
| H    | -0.377927 | -10.271135 | 4.054233  |
| H    | 0.377927  | 10.271135  | -4.054233 |
| H    | -0.377927 | -10.271135 | -4.054233 |
| H    | 0.377927  | 10.271135  | 4.054233  |
| H    | -1.721571 | -12.335285 | 0.000000  |
| H    | 1.721571  | 12.335285  | 0.000000  |

**Table S3.** RHF/6-31G\* optimised Cartesian coordinates of **1(3)**.

| Atom | X         | Y          | Z         |
|------|-----------|------------|-----------|
| C    | 0.013756  | -1.258919  | 0.000000  |
| C    | -0.013756 | 1.258919   | 0.000000  |
| C    | -0.005613 | 2.904141   | 2.347694  |
| C    | 0.005613  | -2.904141  | -2.347694 |
| C    | -0.005613 | 2.904141   | -2.347694 |
| C    | 0.005613  | -2.904141  | 2.347694  |
| C    | 2.231595  | 4.770343   | 2.347179  |
| C    | -2.231595 | -4.770343  | -2.347179 |
| C    | 2.231595  | 4.770343   | -2.347179 |
| C    | -2.231595 | -4.770343  | 2.347179  |
| C    | 2.238779  | 6.416306   | 0.000000  |
| C    | -2.238779 | -6.416306  | 0.000000  |
| C    | 2.215481  | 8.934352   | 0.000000  |
| C    | -2.215481 | -8.934352  | 0.000000  |
| C    | 2.231595  | 10.578332  | 2.354655  |
| C    | -2.231595 | -10.578332 | -2.354655 |
| C    | 2.231595  | 10.578332  | -2.354655 |
| C    | -2.231595 | -10.578332 | 2.354655  |
| C    | 4.523160  | 12.362119  | 2.383381  |
| C    | -4.523160 | -12.362119 | -2.383381 |
| C    | 4.523160  | 12.362119  | -2.383381 |
| C    | -4.523160 | -12.362119 | 2.383381  |
| C    | 4.631941  | 13.992877  | 0.000000  |
| C    | -4.631941 | -13.992877 | 0.000000  |
| H    | -1.751737 | 3.993857   | 2.394114  |
| H    | 1.751737  | -3.993857  | -2.394114 |
| H    | -1.751737 | 3.993857   | -2.394114 |
| H    | 1.751737  | -3.993857  | 2.394114  |
| H    | 3.977923  | 3.680919   | 2.391713  |
| H    | -3.977923 | -3.680919  | -2.391713 |
| H    | 3.977923  | 3.680919   | -2.391713 |
| H    | -3.977923 | -3.680919  | 2.391713  |
| H    | 0.516595  | 11.720500  | 2.360622  |
| H    | -0.516595 | -11.720500 | -2.360622 |
| H    | 0.516595  | 11.720500  | -2.360622 |
| H    | -0.516595 | -11.720500 | 2.360622  |
| H    | 6.240219  | 11.240128  | 2.526498  |
| H    | -6.240219 | -11.240128 | -2.526498 |
| H    | 6.240219  | 11.240128  | -2.526498 |
| H    | -6.240219 | -11.240128 | 2.526498  |
| H    | 0.050676  | 1.815502   | 4.072318  |
| H    | -0.050676 | -1.815502  | -4.072318 |
| H    | 0.050676  | 1.815502   | -4.072318 |
| H    | -0.050676 | -1.815502  | 4.072318  |
| H    | 2.177783  | 5.857948   | 4.072480  |
| H    | -2.177783 | -5.857948  | -4.072480 |
| H    | 2.177783  | 5.857948   | -4.072480 |
| H    | -2.177783 | -5.857948  | 4.072480  |
| H    | 2.202704  | 9.488622   | 4.079034  |
| H    | -2.202704 | -9.488622  | -4.079034 |
| H    | 2.202704  | 9.488622   | -4.079034 |

Electronic Supplementary Material for PCCP

This journal is © The Owner Societies 2007

|   |           |            |           |
|---|-----------|------------|-----------|
| H | -2.202704 | -9.488622  | 4.079034  |
| H | 4.450168  | 13.554255  | 4.054501  |
| H | -4.450168 | -13.554255 | -4.054501 |
| H | 4.450168  | 13.554255  | -4.054501 |
| H | -4.450168 | -13.554255 | 4.054501  |
| H | 3.041440  | 15.298896  | 0.000000  |
| H | -3.041440 | -15.298896 | 0.000000  |
| H | 6.334800  | 15.140942  | 0.000000  |
| H | -6.334800 | -15.140942 | 0.000000  |

---

**Table S4.** RHF/6-31G\* optimised Cartesian coordinates of **1(4)**.

| Atom | X         | Y          | Z         |
|------|-----------|------------|-----------|
| C    | -0.799795 | -1.217497  | 2.347345  |
| C    | 0.799795  | 1.217497   | -2.347345 |
| C    | -0.799795 | -1.217497  | -2.347345 |
| C    | 0.799795  | 1.217497   | 2.347345  |
| C    | 0.330587  | 2.794979   | 0.000000  |
| C    | -0.330587 | -2.794979  | 0.000000  |
| C    | -0.422653 | 5.197776   | 0.000000  |
| C    | 0.422653  | -5.197776  | 0.000000  |
| C    | -0.890586 | 6.775062   | 2.347667  |
| C    | 0.890586  | -6.775062  | -2.347667 |
| C    | -0.890586 | 6.775062   | -2.347667 |
| C    | 0.890586  | -6.775062  | 2.347667  |
| C    | 0.708147  | 9.210599   | 2.347308  |
| C    | -0.708147 | -9.210599  | -2.347308 |
| C    | 0.708147  | 9.210599   | -2.347308 |
| C    | -0.708147 | -9.210599  | 2.347308  |
| C    | 0.239518  | 10.788673  | 0.000000  |
| C    | -0.239518 | -10.788673 | 0.000000  |
| C    | 0.505506  | -13.194144 | 0.000000  |
| C    | -0.505506 | 13.194144  | 0.000000  |
| C    | -0.966256 | 14.772106  | 2.355222  |
| C    | 0.966256  | -14.772106 | -2.355222 |
| C    | -0.966256 | 14.772106  | -2.355222 |
| C    | 0.966256  | -14.772106 | 2.355222  |
| C    | 0.704284  | 17.147489  | 2.382790  |
| C    | -0.704284 | -17.147489 | -2.382790 |
| C    | 0.704284  | 17.147489  | -2.382790 |
| C    | -0.704284 | -17.147489 | 2.382790  |
| C    | 0.329607  | 18.738904  | 0.000000  |
| C    | -0.329607 | -18.738904 | 0.000000  |
| H    | -2.786985 | -0.681191  | 2.393114  |
| H    | 2.786985  | 0.681191   | -2.393114 |
| H    | -2.786985 | -0.681191  | -2.393114 |
| H    | 2.786985  | 0.681191   | 2.393114  |
| H    | -2.877980 | 7.310796   | 2.394472  |
| H    | 2.877980  | -7.310796  | -2.394472 |
| H    | -2.877980 | 7.310796   | -2.394472 |
| H    | 2.877980  | -7.310796  | 2.394472  |
| H    | 2.695514  | 8.674761   | 2.392855  |
| H    | -2.695514 | -8.674761  | -2.392855 |
| H    | 2.695514  | 8.674761   | -2.392855 |
| H    | -2.695514 | -8.674761  | 2.392855  |
| H    | -0.430607 | -2.242599  | 4.072332  |
| H    | 0.430607  | 2.242599   | -4.072332 |
| H    | -0.430607 | -2.242599  | -4.072332 |
| H    | 0.430607  | 2.242599   | 4.072332  |
| H    | -0.520505 | 5.749847   | 4.072413  |
| H    | 0.520505  | -5.749847  | -4.072413 |
| H    | -0.520505 | 5.749847   | -4.072413 |
| H    | 0.520505  | -5.749847  | 4.072413  |
| H    | 0.340278  | 10.235484  | 4.072618  |

Electronic Supplementary Material for PCCP

This journal is © The Owner Societies 2007

|   |           |            |           |
|---|-----------|------------|-----------|
| H | -0.340278 | -10.235484 | -4.072618 |
| H | 0.340278  | 10.235484  | -4.072618 |
| H | -0.340278 | -10.235484 | 4.072618  |
| H | 1.574511  | -19.519771 | 0.000000  |
| H | -1.574511 | 19.519771  | 0.000000  |
| H | 1.619895  | 20.336708  | 0.000000  |
| H | -1.619895 | -20.336708 | 0.000000  |
| H | 2.939954  | -15.364110 | -2.362975 |
| H | -2.939954 | 15.364110  | 2.362975  |
| H | 2.939954  | -15.364110 | 2.362975  |
| H | -2.939954 | 15.364110  | -2.362975 |
| H | -2.674482 | -16.576605 | -2.524449 |
| H | 2.674482  | 16.576605  | 2.524449  |
| H | -2.674482 | -16.576605 | 2.524449  |
| H | 2.674482  | 16.576605  | -2.524449 |
| H | 0.674411  | -13.721419 | -4.079357 |
| H | -0.674411 | 13.721419  | 4.079357  |
| H | 0.674411  | -13.721419 | 4.079357  |
| H | -0.674411 | 13.721419  | -4.079357 |
| H | -0.286954 | -18.265933 | -4.054361 |
| H | 0.286954  | 18.265933  | 4.054361  |
| H | -0.286954 | -18.265933 | 4.054361  |
| H | 0.286954  | 18.265933  | -4.054361 |

---

**Table S5.** RHF/6-31G\* optimised Cartesian coordinates of **1(5)**.

| Atom | X         | Y          | Z         |
|------|-----------|------------|-----------|
| C    | 0.381853  | -1.199707  | 0.000000  |
| C    | -0.381853 | 1.199707   | 0.000000  |
| C    | -0.857105 | 2.775199   | 2.347260  |
| C    | 0.857105  | -2.775199  | -2.347260 |
| C    | -0.857105 | 2.775199   | -2.347260 |
| C    | 0.857105  | -2.775199  | 2.347260  |
| C    | 0.734846  | 5.215229   | 2.348125  |
| C    | -0.734846 | -5.215229  | -2.348125 |
| C    | 0.734846  | 5.215229   | -2.348125 |
| C    | -0.734846 | -5.215229  | 2.348125  |
| C    | 0.265388  | 6.791549   | 0.000000  |
| C    | -0.265388 | -6.791549  | 0.000000  |
| C    | -0.485506 | 9.195056   | 0.000000  |
| C    | 0.485506  | -9.195056  | 0.000000  |
| C    | -0.944445 | 10.775870  | 2.346885  |
| C    | 0.944445  | -10.775870 | -2.346885 |
| C    | -0.944445 | 10.775870  | -2.346885 |
| C    | 0.944445  | -10.775870 | 2.346885  |
| C    | 0.678055  | 13.195865  | 2.348026  |
| C    | -0.678055 | -13.195865 | -2.348026 |
| C    | 0.678055  | 13.195865  | -2.348026 |
| C    | -0.678055 | -13.195865 | 2.348026  |
| C    | 0.226584  | 14.778037  | 0.000000  |
| C    | -0.226584 | -14.778037 | 0.000000  |
| C    | -0.493131 | 17.191273  | 0.000000  |
| C    | 0.493131  | -17.191273 | 0.000000  |
| C    | -0.935069 | 18.775241  | -2.355026 |
| C    | 0.935069  | -18.775241 | 2.355026  |
| C    | -0.935069 | 18.775241  | 2.355026  |
| C    | 0.935069  | -18.775241 | -2.355026 |
| C    | 0.765370  | 21.129024  | 2.382972  |
| C    | -0.765370 | -21.129024 | -2.382972 |
| C    | 0.765370  | 21.129024  | -2.382972 |
| C    | -0.765370 | -21.129024 | 2.382972  |
| C    | 0.411231  | 22.724995  | 0.000000  |
| C    | -0.411231 | -22.724995 | 0.000000  |
| H    | -2.846046 | 3.305031   | 2.392550  |
| H    | 2.846046  | -3.305031  | -2.392550 |
| H    | -2.846046 | 3.305031   | -2.392550 |
| H    | 2.846046  | -3.305031  | 2.392550  |
| H    | 2.723540  | 4.684624   | 2.397356  |
| H    | -2.723540 | -4.684624  | -2.397356 |
| H    | 2.723540  | 4.684624   | -2.397356 |
| H    | -2.723540 | -4.684624  | 2.397356  |
| H    | -2.926453 | 11.331385  | 2.388916  |
| H    | 2.926453  | -11.331385 | -2.388916 |
| H    | -2.926453 | 11.331385  | -2.388916 |
| H    | 2.926453  | -11.331385 | 2.388916  |
| H    | 2.660153  | 12.641380  | 2.396451  |
| H    | -2.660153 | -12.641380 | -2.396451 |
| H    | 2.660153  | 12.641380  | -2.396451 |



|   |           |            |           |
|---|-----------|------------|-----------|
| H | -2.660153 | -12.641380 | 2.396451  |
| H | -0.485019 | 1.751289   | 4.072333  |
| H | 0.485019  | -1.751289  | -4.072333 |
| H | -0.485019 | 1.751289   | -4.072333 |
| H | 0.485019  | -1.751289  | 4.072333  |
| H | 0.359985  | 6.239706   | 4.072234  |
| H | -0.359985 | -6.239706  | -4.072234 |
| H | 0.359985  | 6.239706   | -4.072234 |
| H | -0.359985 | -6.239706  | 4.072234  |
| H | -0.588676 | 9.747495   | 4.072731  |
| H | 0.588676  | -9.747495  | -4.072731 |
| H | -0.588676 | 9.747495   | -4.072731 |
| H | 0.588676  | -9.747495  | 4.072731  |
| H | 0.317313  | 14.224921  | 4.072340  |
| H | -0.317313 | -14.224921 | -4.072340 |
| H | 0.317313  | 14.224921  | -4.072340 |
| H | -0.317313 | -14.224921 | 4.072340  |
| H | 2.901331  | -19.391495 | 2.362366  |
| H | -2.901331 | 19.391495  | -2.362366 |
| H | 2.901331  | -19.391495 | -2.362366 |
| H | -2.901331 | 19.391495  | 2.362366  |
| H | 0.656756  | -17.720947 | 4.079214  |
| H | -0.656756 | 17.720947  | -4.079214 |
| H | 0.656756  | -17.720947 | -4.079214 |
| H | -0.656756 | 17.720947  | 4.079214  |
| H | -0.363519 | -22.252435 | 4.054953  |
| H | 0.363519  | 22.252435  | -4.054953 |
| H | -0.363519 | -22.252435 | -4.054953 |
| H | 0.363519  | 22.252435  | 4.054953  |
| H | -2.728032 | -20.532415 | 2.523678  |
| H | 2.728032  | 20.532415  | -2.523678 |
| H | -2.728032 | -20.532415 | -2.523678 |
| H | 2.728032  | 20.532415  | 2.523678  |
| H | 1.482661  | -23.530406 | 0.000000  |
| H | -1.482661 | 23.530406  | 0.000000  |
| H | -1.721673 | -24.306257 | 0.000000  |
| H | 1.721673  | 24.306257  | 0.000000  |

---

**Table S6.** RHF/6-31G\* optimised Cartesian coordinates of **2(1)**.

| <b>Atom</b> | <b>X</b>  | <b>Y</b>  | <b>Z</b>  |
|-------------|-----------|-----------|-----------|
| C           | 0.537486  | -1.337269 | 2.637098  |
| C           | -0.537486 | 1.337269  | -2.637098 |
| C           | 0.537486  | -1.337269 | -2.637098 |
| C           | -0.537486 | 1.337269  | 2.637098  |
| S           | -0.537486 | -3.253995 | 0.000000  |
| S           | 0.537486  | 3.253995  | 0.000000  |
| H           | 2.583118  | -1.283675 | 2.660210  |
| H           | -2.583118 | 1.283675  | -2.660210 |
| H           | 2.583118  | -1.283675 | -2.660210 |
| H           | -2.583118 | 1.283675  | 2.660210  |
| H           | -0.086759 | -2.332658 | 4.315390  |
| H           | 0.086759  | 2.332658  | -4.315390 |
| H           | -0.086759 | -2.332658 | -4.315390 |
| H           | 0.086759  | 2.332658  | 4.315390  |

**Table S7.** RHF/6-31G\* optimised Cartesian coordinates of **2(2)**.

| Atom | X         | Y         | Z         |
|------|-----------|-----------|-----------|
| C    | -0.409226 | -1.191850 | 0.000000  |
| C    | 0.409226  | 1.191850  | 0.000000  |
| C    | 0.907269  | 2.743111  | 2.365125  |
| C    | -0.907269 | -2.743111 | -2.365125 |
| C    | 0.907269  | 2.743111  | -2.365125 |
| C    | -0.907269 | -2.743111 | 2.365125  |
| C    | -0.907269 | 4.991133  | 2.599299  |
| C    | 0.907269  | -4.991133 | -2.599299 |
| C    | -0.907269 | 4.991133  | -2.599299 |
| C    | 0.907269  | -4.991133 | 2.599299  |
| S    | -0.633970 | 7.213267  | 0.000000  |
| S    | 0.633970  | -7.213267 | 0.000000  |
| H    | 2.829992  | 3.461738  | 2.291368  |
| H    | -2.829992 | -3.461738 | -2.291368 |
| H    | 2.829992  | 3.461738  | -2.291368 |
| H    | -2.829992 | -3.461738 | 2.291368  |
| H    | 0.765895  | 1.631987  | 4.071156  |
| H    | -0.765895 | -1.631987 | -4.071156 |
| H    | 0.765895  | 1.631987  | -4.071156 |
| H    | -0.765895 | -1.631987 | 4.071156  |
| H    | -2.840150 | 4.323777  | 2.729680  |
| H    | 2.840150  | -4.323777 | -2.729680 |
| H    | -2.840150 | 4.323777  | -2.729680 |
| H    | 2.840150  | -4.323777 | 2.729680  |
| H    | -0.501018 | 6.059289  | 4.298131  |
| H    | 0.501018  | -6.059289 | -4.298131 |
| H    | -0.501018 | 6.059289  | -4.298131 |
| H    | 0.501018  | -6.059289 | 4.298131  |

**Table S8.** RHF/6-31G\* optimised Cartesian coordinates of **2(3)**.

| Atom | x         | y          | z         |
|------|-----------|------------|-----------|
| C    | 0.753482  | 1.246365   | 2.345719  |
| C    | -0.753482 | -1.246365  | -2.345719 |
| C    | 0.753482  | 1.246365   | -2.345719 |
| C    | -0.753482 | -1.246365  | 2.345719  |
| C    | -0.232040 | -2.810348  | 0.000000  |
| C    | 0.232040  | 2.810348   | 0.000000  |
| C    | 0.578435  | -5.195688  | 0.000000  |
| C    | -0.578435 | 5.195688   | 0.000000  |
| C    | 1.065337  | -6.746057  | 2.367948  |
| C    | -1.065337 | 6.746057   | -2.367948 |
| C    | 1.065337  | -6.746057  | -2.367948 |
| C    | -1.065337 | 6.746057   | 2.367948  |
| C    | -0.753482 | -8.991316  | 2.599973  |
| C    | 0.753482  | 8.991316   | -2.599973 |
| C    | -0.753482 | -8.991316  | -2.599973 |
| C    | 0.753482  | 8.991316   | 2.599973  |
| S    | -0.482726 | -11.212214 | 0.000000  |
| S    | 0.482726  | 11.212214  | 0.000000  |
| H    | 2.759329  | 0.786106   | 2.389695  |
| H    | -2.759329 | -0.786106  | -2.389695 |
| H    | 2.759329  | 0.786106   | -2.389695 |
| H    | -2.759329 | -0.786106  | 2.389695  |
| H    | 2.987215  | -7.469303  | 2.306613  |
| H    | -2.987215 | 7.469303   | -2.306613 |
| H    | 2.987215  | -7.469303  | -2.306613 |
| H    | -2.987215 | 7.469303   | 2.306613  |
| H    | -2.685619 | -8.321537  | 2.729000  |
| H    | 2.685619  | 8.321537   | -2.729000 |
| H    | -2.685619 | -8.321537  | -2.729000 |
| H    | 2.685619  | 8.321537   | 2.729000  |
| H    | 0.350857  | 2.251829   | 4.074122  |
| H    | -0.350857 | -2.251829  | -4.074122 |
| H    | 0.350857  | 2.251829   | -4.074122 |
| H    | -0.350857 | -2.251829  | 4.074122  |
| H    | 0.911889  | -5.630266  | 4.070049  |
| H    | -0.911889 | 5.630266   | -4.070049 |
| H    | 0.911889  | -5.630266  | -4.070049 |
| H    | -0.911889 | 5.630266   | 4.070049  |
| H    | -0.350891 | -10.062659 | 4.297756  |
| H    | 0.350891  | 10.062659  | -4.297756 |
| H    | -0.350891 | -10.062659 | -4.297756 |
| H    | 0.350891  | 10.062659  | 4.297756  |

**Table S9.** RHF/6-31G\* optimised Cartesian coordinates of **2(4)**.

| Atom | X         | Y          | Z         |
|------|-----------|------------|-----------|
| C    | -0.004555 | -1.258938  | 0.000000  |
| C    | 0.004555  | 1.258938   | 0.000000  |
| C    | 0.027289  | 2.902344   | 2.348713  |
| C    | -0.027289 | -2.902344  | -2.348713 |
| C    | 0.027289  | 2.902344   | -2.348713 |
| C    | -0.027289 | -2.902344  | 2.348713  |
| C    | 2.271210  | 4.760356   | 2.344493  |
| C    | -2.271210 | -4.760356  | -2.344493 |
| C    | 2.271210  | 4.760356   | -2.344493 |
| C    | -2.271210 | -4.760356  | 2.344493  |
| C    | 2.276123  | 6.410550   | 0.000000  |
| C    | -2.276123 | -6.410550  | 0.000000  |
| C    | 2.255158  | 8.929705   | 0.000000  |
| C    | -2.255158 | -8.929705  | 0.000000  |
| C    | 2.271210  | 10.555002  | 2.368213  |
| C    | -2.271210 | -10.555002 | -2.368213 |
| C    | 2.271210  | 10.555002  | -2.368213 |
| C    | -2.271210 | -10.555002 | 2.368213  |
| C    | 4.689344  | 12.137750  | 2.598291  |
| C    | -4.689344 | -12.137750 | -2.598291 |
| C    | 4.689344  | 12.137750  | -2.598291 |
| C    | -4.689344 | -12.137750 | 2.598291  |
| S    | 5.105652  | 14.338347  | 0.000000  |
| S    | -5.105652 | -14.338347 | 0.000000  |
| H    | -1.714790 | 3.998006   | 2.402647  |
| H    | 1.714790  | -3.998006  | -2.402647 |
| H    | -1.714790 | 3.998006   | -2.402647 |
| H    | 1.714790  | -3.998006  | 2.402647  |
| H    | 4.014286  | 3.666218   | 2.375752  |
| H    | -4.014286 | -3.666218  | -2.375752 |
| H    | 4.014286  | 3.666218   | -2.375752 |
| H    | -4.014286 | -3.666218  | 2.375752  |
| H    | 0.662669  | 11.831744  | 2.309380  |
| H    | -0.662669 | -11.831744 | -2.309380 |
| H    | 0.662669  | 11.831744  | -2.309380 |
| H    | -0.662669 | -11.831744 | 2.309380  |
| H    | 6.325250  | 10.910224  | 2.722270  |
| H    | -6.325250 | -10.910224 | -2.722270 |
| H    | 6.325250  | 10.910224  | -2.722270 |
| H    | -6.325250 | -10.910224 | 2.722270  |
| H    | 0.086904  | 1.813002   | 4.072402  |
| H    | -0.086904 | -1.813002  | -4.072402 |
| H    | 0.086904  | 1.813002   | -4.072402 |
| H    | -0.086904 | -1.813002  | 4.072402  |
| H    | 2.232181  | 5.840157   | 4.074753  |
| H    | -2.232181 | -5.840157  | -4.074753 |
| H    | 2.232181  | 5.840157   | -4.074753 |
| H    | -2.232181 | -5.840157  | 4.074753  |
| H    | 2.078709  | 9.445731   | 4.070582  |
| H    | -2.078709 | -9.445731  | -4.070582 |
| H    | 2.078709  | 9.445731   | -4.070582 |

Electronic Supplementary Material for PCCP

This journal is © The Owner Societies 2007

|   |           |            |           |
|---|-----------|------------|-----------|
| H | -2.078709 | -9.445731  | 4.070582  |
| H | 4.635721  | 13.278065  | 4.298073  |
| H | -4.635721 | -13.278065 | -4.298073 |
| H | 4.635721  | 13.278065  | -4.298073 |
| H | -4.635721 | -13.278065 | 4.298073  |

---

**Table S10.** RHF/6-31G\* optimised Cartesian coordinates of **2(5)**.

| Atom | X         | Y          | Z         |
|------|-----------|------------|-----------|
| C    | -0.796329 | -1.219840  | 2.347566  |
| C    | 0.796329  | 1.219840   | -2.347566 |
| C    | -0.796329 | -1.219840  | -2.347566 |
| C    | 0.796329  | 1.219840   | 2.347566  |
| C    | 0.322293  | 2.794997   | 0.000000  |
| C    | -0.322293 | -2.794997  | 0.000000  |
| C    | -0.440598 | 5.194522   | 0.000000  |
| C    | 0.440598  | -5.194522  | 0.000000  |
| C    | -0.922109 | 6.765147   | 2.349387  |
| C    | 0.922109  | -6.765147  | -2.349387 |
| C    | -0.922109 | 6.765147   | -2.349387 |
| C    | 0.922109  | -6.765147  | 2.349387  |
| C    | 0.642732  | 9.222441   | 2.344700  |
| C    | -0.642732 | -9.222441  | -2.344700 |
| C    | 0.642732  | 9.222441   | -2.344700 |
| C    | -0.642732 | -9.222441  | 2.344700  |
| C    | 0.140178  | 10.793847  | 0.000000  |
| C    | -0.140178 | -10.793847 | 0.000000  |
| C    | 0.655178  | -13.184229 | 0.000000  |
| C    | -0.655178 | 13.184229  | 0.000000  |
| C    | -1.139590 | 14.736213  | 2.367696  |
| C    | 1.139590  | -14.736213 | -2.367696 |
| C    | -1.139590 | 14.736213  | -2.367696 |
| C    | 1.139590  | -14.736213 | 2.367696  |
| C    | 0.678237  | 16.982704  | 2.598602  |
| C    | -0.678237 | -16.982704 | -2.598602 |
| C    | 0.678237  | 16.982704  | -2.598602 |
| C    | -0.678237 | -16.982704 | 2.598602  |
| S    | 0.403152  | 19.204905  | 0.000000  |
| S    | -0.403152 | -19.204905 | 0.000000  |
| H    | -2.785055 | -0.689762  | 2.393600  |
| H    | 2.785055  | 0.689762   | -2.393600 |
| H    | -2.785055 | -0.689762  | -2.393600 |
| H    | 2.785055  | 0.689762   | 2.393600  |
| H    | -2.916491 | 7.272879   | 2.405502  |
| H    | 2.916491  | -7.272879  | -2.405502 |
| H    | -2.916491 | 7.272879   | -2.405502 |
| H    | 2.916491  | -7.272879  | 2.405502  |
| H    | 2.637624  | 8.716658   | 2.375597  |
| H    | -2.637624 | -8.716658  | -2.375597 |
| H    | 2.637624  | 8.716658   | -2.375597 |
| H    | -2.637624 | -8.716658  | 2.375597  |
| H    | -0.423455 | -2.243080  | 4.072686  |
| H    | 0.423455  | 2.243080   | -4.072686 |
| H    | -0.423455 | -2.243080  | -4.072686 |
| H    | 0.423455  | 2.243080   | 4.072686  |
| H    | -0.528952 | 5.745821   | 4.072057  |
| H    | 0.528952  | -5.745821  | -4.072057 |
| H    | -0.528952 | 5.745821   | -4.072057 |
| H    | 0.528952  | -5.745821  | 4.072057  |
| H    | 0.274032  | 10.238957  | 4.074547  |

Electronic Supplementary Material for PCCP

This journal is © The Owner Societies 2007

|   |           |            |           |
|---|-----------|------------|-----------|
| H | -0.274032 | -10.238957 | -4.074547 |
| H | 0.274032  | 10.238957  | -4.074547 |
| H | -0.274032 | -10.238957 | 4.074547  |
| H | 3.061699  | -15.459405 | -2.306977 |
| H | -3.061699 | 15.459405  | 2.306977  |
| H | 3.061699  | -15.459405 | 2.306977  |
| H | -3.061699 | 15.459405  | -2.306977 |
| H | -2.610933 | -16.313603 | -2.723124 |
| H | 2.610933  | 16.313603  | 2.723124  |
| H | -2.610933 | -16.313603 | 2.723124  |
| H | 2.610933  | 16.313603  | -2.723124 |
| H | 0.985517  | -13.621731 | -4.070616 |
| H | -0.985517 | 13.621731  | 4.070616  |
| H | 0.985517  | -13.621731 | 4.070616  |
| H | -0.985517 | 13.621731  | -4.070616 |
| H | -0.278590 | -18.052068 | -4.298406 |
| H | 0.278590  | 18.052068  | 4.298406  |
| H | -0.278590 | -18.052068 | 4.298406  |
| H | 0.278590  | 18.052068  | -4.298406 |

---
